# Supplementary material
Source: Springer Nature journal article supplement (https://www.springermedizin.de/resource/supplementary/12888_2006_179_MOESM1_ESM.pdf/9482094)

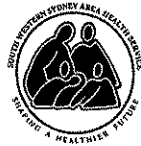

# **SOUTH WESTERN SYDNEY AREA MENTAL HEALTH SERVICE**

**Area Mental Health Education in conjunction  
with Partnerships Program**

**Curriculum for 8 Hour Workshop**

***'Working Together for Mental Health'***

Developed By:

- Wayne Forward (Area Mental Health Nurse Educator)
- Gillian Holt (Area Partnerships Project Officer)
- Narelle Heywood (Consumer Advocate)

In consultation with:

- Sue Willis (Area Mental Health Education Coordinator)

**February 2003  
Revised January 2004**

## Background

---

---

The need to provide basic information on mental health for community organisations and individuals has been identified by key mental health planning documents. Raising understanding and awareness about mental health is an important aspect of mental health promotion, prevention and early intervention.

The Second National Mental Health Plan (1998) identifies the need to increase mental health literacy amongst key groups in the community, including workers in government and non-government service agencies. Mental health literacy refers to information about recognition of early warning signs, how to respond to mental illness and how to get professional assistance. The Second National Health Plan also emphasises, the need for community awareness training to reduce the stigma associated with mental illness. This strategic direction is reiterated in the NSW planning document 'Caring for Mental Health: A framework for mental health care in NSW' (1998).

South Western Sydney Area Health Service has been committed to developing partnerships with community organisations in mental health through the Partnership Development Project. A number of one-day 'Understanding Mental Illness' training workshops have been held from 2000-2002 as part of this project. Around 240 people attended the workshops at 4 different venues across South Western Sydney. The workshops covered topics such as major mental health disorders, myths and stigma, consumer experiences of mental illness, treatment options and referral pathways. All workshops were fully booked. In general, the response by participants was very enthusiastic. Participants appreciated the input from mental health consumers and identified that they would have liked additional information on a number of topics. This new workshop incorporates feedback provided in the evaluations of those previous workshops.

The workshop is designed for individuals in the community interacting with people experiencing mental health problems and disorders. It is expected that it will be particularly useful for workers and volunteers from non-government and other community organisations, although it may also be helpful for staff in government organisations like the Dept of Housing and Centrelink. Input from local mental health services will be helpful in building links between those in the community and mental health service providers.

### References:

- Australian Health Ministers, *Second National Mental Health Plan*, Mental Health Branch, Commonwealth Department of Health and Community Services, July 1998.  
NSW Department of Health Policy, *Caring for Mental Health: A Framework for Mental Health Care in NSW*, October 1998.

## Workshop Overview

---

---

### Target Audience

Individuals interacting with people who experience mental health problems or disorders within the wider community

### Overview

A one day workshop, presented by mental health consumers and carers in collaboration with mental health professionals, for community organisations, that provides introductory information about mental health problems and disorders in an endeavour to increase the awareness of mental health issues and participants ability to work with and support people experiencing mental health problems or disorders and to work collaboratively with mental health services.

### Aim

To better equip individuals in community organisations to work collaboratively with consumers, families and carers, and mental health services in providing mental health care, through having a greater personal understanding of the impact of mental illness.

### Objectives

Having attended the workshop participants will be better able to:

- Identify the impact of stigma surrounding mental illness and the effect this has on mental health consumers and their families
- Identify with the experiences of someone who has, or cares for someone who, experiences mental health problems or disorders
- Understand the concept of the mental health continuum and describe the major diagnostic categorisation of mental illness
- Discuss and provide information about a variety of treatment interventions necessary to provide an holistic mental health care
- Understand the concept of collaborative partnerships in mental health care and discuss practical strategies for community organisations working with people experiencing mental health problems and their families
- Comment on issues surrounding suicide pertinent to community organisations
- Understand about the range of local clinical mental health services and local referral procedures

### Resources

Resources required through the day are as follows:

- Handbook: The handbook will include SANE information sheets, information sheets developed by SWSAHS, MHS contact details
- Whiteboard and markers
- Overhead projector and screen
- LCD projector and laptop computer
- Laminated case studies and stigma questions
- Butcher's paper and pens

## Program

---

---

|             |                                                                                                          |
|-------------|----------------------------------------------------------------------------------------------------------|
| 0845 – 0900 | Registration                                                                                             |
| 0900 – 0920 | Welcome and Introductions                                                                                |
| 0920 – 1000 | Values Beliefs and Attitudes                                                                             |
| 1000 – 1030 | 'Life in our Shoes'                                                                                      |
| 1030 – 1045 | Morning tea                                                                                              |
| 1045 – 1145 | Mental Disorders – What are they really?                                                                 |
| 1145 – 1230 | Treatment Options                                                                                        |
| 1230 – 1315 | Lunch                                                                                                    |
| 1315 – 1430 | How can you help? Practical strategies for working with people with mental health problems and disorders |
| 1430 – 1500 | What about Suicide?                                                                                      |
| 1500 – 1515 | Afternoon Tea                                                                                            |
| 1515 – 1615 | What help is around? Panel with representatives from the sector health service                           |
| 1615 – 1630 | Summary and Evaluation                                                                                   |

## **Session Aims, Objectives and Outlines**

### **Welcome and Introduction**

#### **Overview**

Presenters introduce themselves to the group and give an overview of the day's program and content. Participants have the opportunity to introduce themselves to the group.

#### **Aim**

To establish and provide participants with information regarding the workshop to assist in establishing a learning milieu

#### **Objectives**

By the end of the session participants will be given the opportunity to:

- Introduce themselves to others in the room
- State personal aims and objectives for the day
- Hear the outline of the day's program
- Develop a group learning agreement

#### **Resources**

- PowerPoint Presentation
- Program Handout

#### **Content**

| <b>Time</b>             | <b>Content</b>                                                                                                                                                                                                                                                                                                                                                                                                                                                                                                                                                                                                                                  | <b>Resources</b> |
|-------------------------|-------------------------------------------------------------------------------------------------------------------------------------------------------------------------------------------------------------------------------------------------------------------------------------------------------------------------------------------------------------------------------------------------------------------------------------------------------------------------------------------------------------------------------------------------------------------------------------------------------------------------------------------------|------------------|
| 9.00 – 9.20<br>(20 min) | <ul style="list-style-type: none"> <li>• <i>Have PP slide displaying title of workshop as participants arrive.</i></li> <li>• Mental Health professional introduces Self and other presenters and establishes group learning agreement</li> <li>• <i>Consumer or carer presenter facilitates participants introduction of themselves stating their name position, organisation and what they hope to get out of the day.</i></li> <li>• Overview of the mental health continuum and major definitions (mental illness, mental health, mental health problems, mental disorders) – see Mental Disorders session 4 aims and objectives</li> </ul> |                  |

## **Session Aims, Objectives and Outlines**

---

---

### **Values, Beliefs and Attitudes**

#### **Overview**

A presentation of a scenario and small group discussion around the issues of stigma and discrimination that affect people experiencing mental health problems and their families

#### **Aim**

Identify the impact of stigma surrounding mental illness and the effect this has on mental health consumers and their families

#### **Objectives**

At the end of the session participants will be better able to:

- Identify the negative stigma attached to mental health problems and disorders and the impact this has on mental health consumers and their families
- Identify major contributors to negative attitudes and stigma about mental illness
- Identify what can be done decrease the stigma that surrounds mental illness
- Identify the impact of culture on stigma

#### **Resources**

- PowerPoint slide
- Butchers paper and pens
- Laminated stigma questions

#### **Content**

| <b>Time</b>            | <b>Content</b>                                                                                                                | <b>Resources</b> |
|------------------------|-------------------------------------------------------------------------------------------------------------------------------|------------------|
| 9.20 – 10.00<br>40 min | Presentation of scenario of Bart<br>Small group discussion of stigma questions<br>Small groups report back to the whole group |                  |

## **Session Aims, Objectives and Outlines**

---

---

### **'Life in our Shoes'**

#### **Session Overview**

A facilitated discussion between the interviewer and interviewees (consumer and carer) regarding their experiences with mental illness and the impact of stigma

#### **Aim**

Identify with the experiences of someone who has, or cares for someone, who experiences mental health problems or disorders

#### **Objectives**

By the end of the session participants will be better able to:

- Empathise with what it is like to experience a mental illness or disorder or care for someone who has.
- Describe some of the issues faced by an individual following a diagnosis of a mental illness.
- Describe some of the positive ways to support people with mental health problems and their families
- Describe the impact of having a friend or relative diagnosed with a mental illness
- Describe the issues faced by carers when caring for a friend or relative with a mental illness.

#### **Resources Required**

- Interview Questions

## **Session Aims, Objectives and Outlines**

### **Session Outline**

| <b>Time</b>               | <b>Content</b>                                                                                                                                                                                                                                                                                                                                                                                                                                                                                                                                                                                                                                                                                                                                                                                                                                                                                                                                                                                                                                                                                       | <b>Resources</b> |
|---------------------------|------------------------------------------------------------------------------------------------------------------------------------------------------------------------------------------------------------------------------------------------------------------------------------------------------------------------------------------------------------------------------------------------------------------------------------------------------------------------------------------------------------------------------------------------------------------------------------------------------------------------------------------------------------------------------------------------------------------------------------------------------------------------------------------------------------------------------------------------------------------------------------------------------------------------------------------------------------------------------------------------------------------------------------------------------------------------------------------------------|------------------|
| 10.00 – 10.30<br>(25 min) | <ul style="list-style-type: none"> <li>• Introduce consumer and carer to the group (name only)</li> <li>• Outline the interview process and the appropriateness of asking questions by the group</li> <li>• Conduct Interview following as a guide the following questions:               <ol style="list-style-type: none"> <li>1. Could you tell us a little bit about yourself? (What you do with yourself and Why you have come here to day)</li> <li>2. Consumer Only) Briefly could you outline what it has been like for you to experience the loss of your mental health?</li> <li>3. Consumer – From your experience what can you tell us about the way that people who have a mental health problem are treated?<br/>Carer – How difficult was it for you as a carer to support your family member?</li> <li>4. Are you aware of ever having experienced stigma or discrimination because of mental health issues?</li> <li>5. What positive things can people do to support you?</li> <li>6. What is one thing you would like people to know about mental illness?</li> </ol> </li> </ul> |                  |



## Session Aims, Objectives and Outlines

### Mental Disorders – What are they really?

#### Overview

Following the brief introduction given in the welcome about the mental health continuum, mental health as a concept is explored and a brief summary given of the major diagnostic categories used in mental health care

#### Aim

Understand the concept of the mental health continuum and describe the major diagnostic categorisation of mental illness

#### Objectives

At the end of this session participants will be better able to:

- Understand the concept of the mental health continuum and define mental health
- Describe what is meant by the following terms
  - Schizophrenia
  - Depression
  - Bi-Polar Affective Disorder
  - Anxiety Disorders
  - Personality Disorders
- Describe the impact of different symptoms on an individual's life

#### Resources

- PowerPoint Presentation
- Handouts

#### Content

| Time                  | Content                                                                                                                                                                                                                                                                 | Resources                            |
|-----------------------|-------------------------------------------------------------------------------------------------------------------------------------------------------------------------------------------------------------------------------------------------------------------------|--------------------------------------|
| 1045 - 1145<br>60 min | <ul style="list-style-type: none"><li>• Go through PowerPoint Presentation, using stories and personal examples to illustrate symptoms and their impact</li><li>• Period of time allowed for questions following the presentation of each diagnostic category</li></ul> | PowerPoint Presentation and Handouts |

## Session Aims, Objectives and Outlines

### Treatment Options

#### Overview

A presentation of the variety of interventions that can be used in the treatment of mental health problems or disorders necessary to provide a holistic mental health care

#### Aim

Discuss and provide information about a variety of treatment interventions necessary to provide holistic mental health care

#### Objectives

By the end of the session participants will be better able to:

- Describe the role, range and impact of medical based interventions
- Describe the role of psychological and psychosocial interventions
- Explore the importance of psychosocial rehabilitation
- Understand the importance of consumer and carer empowerment and the role of advocacy

#### Resources

- PowerPoint Presentation

#### Outline

| Time                   | Content                                                                                                                                                                    | Resources |
|------------------------|----------------------------------------------------------------------------------------------------------------------------------------------------------------------------|-----------|
| 1145 – 1230<br>45 mins | <ul style="list-style-type: none"><li>• Work through the PP Presentation</li><li>• Period of time allowed for questions following the presentation of each slide</li></ul> |           |

## Session Aims, Objectives and Outlines

### How can you help?

#### Overview

A brief presentation on the role of partnerships and skills for working with people experiencing mental health problems and disorders. Following this small groups work on individual scenarios allowing participants the opportunity to discuss and develop some practical strategies that they can use in their workplace to assist them to better work with people experiencing a mental illness or disorder

#### Aim

Understand the concept of collaborative partnerships in mental health care and discuss practical strategies for community organisations working with people experiencing mental health problems and their families

#### Objectives

At the completion of the session participants will be better able to:

- Describe the role and range of government and non-government organisations working in partnership to provide services to people experiencing mental health problems and their families
- Describe positive ways to communicate and interact with people with mental health problems and disorders
- Describe positive ways in which a community organisation can assist a person with a mental health problem or disorder

#### Resources

- PowerPoint Presentation
- Laminated Scenarios and Questions
- Butchers paper and pens

#### Outline

| Time                  | Content                                                                                                                                                                                                                                                                                                | Resources |
|-----------------------|--------------------------------------------------------------------------------------------------------------------------------------------------------------------------------------------------------------------------------------------------------------------------------------------------------|-----------|
| 1330 – 1430<br>60 min | <ul style="list-style-type: none"><li>• Work through the PP Presentation</li><li>• Period of time allowed for questions following the presentation of each slide</li><li>• Work through scenarios in small groups and summarise small group discussion back to the large group at conclusion</li></ul> |           |

## Session Aims, Objectives and Outlines

### What about Suicide?

#### Overview

A brief look at the issue of suicide from a community perspective

#### Aim

Comment on issues surrounding suicide pertinent to community organisations

#### Objectives

At the end of the session participants will be better able to:

- List some current statistics related to suicidal behaviour, suicide attempts and deaths by suicide
- Discuss risk factors associated with suicide
- Discuss the importance of protective factors

#### Resources

- PowerPoint presentation
- Scenario

#### Outline

| Time                  | Content                                                                                                                                               | Resources |
|-----------------------|-------------------------------------------------------------------------------------------------------------------------------------------------------|-----------|
| 1430 – 1500<br>30 min | <ul style="list-style-type: none"><li>• Work through PowerPoint presentation</li><li>• Facilitate large group discussion of scenario - Fred</li></ul> |           |

## **Session Aims, Objectives and Outlines**

---

---

### **What help is around?**

#### **Overview**

A presentation by the local Mental Health service, outlining their role, services and facilities and the referral process to the MH service concluding with an opportunity for participants to ask questions.

#### **Aim**

Understand about the range of local clinical mental health services and local referral procedures

#### **Objectives**

At the end of the session participants will be better able to:

- Name some members of the local mental health service
- List the variety of services offered by the local mental health service
- List the phone numbers of the local Mental Health Service and referral processes

#### **Resources**

- Sector based PP presentation

#### **Outline**

| <b>Time</b>           | <b>Content</b>                                                                                                                                                                                                                                                                                                                          | <b>Resources</b> |
|-----------------------|-----------------------------------------------------------------------------------------------------------------------------------------------------------------------------------------------------------------------------------------------------------------------------------------------------------------------------------------|------------------|
| 1515 – 1615<br>60 min | <ul style="list-style-type: none"><li>• Presentation of an overview of the local Mental Health service, including philosophy of care and basic structure, and a description of each of the facilities</li><li>• Explanation of the referral/intake system</li><li>• A panel discussion allowing participants to ask questions</li></ul> |                  |

## **Session Aims, Objectives and Outlines**

---

---

### **Summary and Evaluation**

#### **Overview**

A summary of the day will be given and an opportunity for participants to evaluate the day.

#### **Aim**

To reinforce the content and evaluate the workshop

#### **Objectives**

By the end of the session participants will be better able to

- Summarise the content of the workshop
- Reflect on the usefulness of the workshop to their professional skills and clinical practice.

#### **Resources**

- PowerPoint presentation
- Evaluation form
- Certificates of attendance

#### **Outline**

| <b>Time</b>            | <b>Content</b>                                                                                                                                                            | <b>Resources</b> |
|------------------------|---------------------------------------------------------------------------------------------------------------------------------------------------------------------------|------------------|
| 1615 – 1630<br>(15min) | <ul style="list-style-type: none"><li>• Go through PowerPoint presentation summary</li><li>• Pass out evaluations</li><li>• Pass out certificates of attendance</li></ul> |                  |

## Participant Handouts

Every participant receives the following

### Information on mental illness

Copies of each of the SANE handouts titled:

- Mental Illness the facts
- Schizophrenia
- Bipolar Disorder
- Depression
- Treatments for Mental illnesses
- Anxiety Disorders

These can all be accessed from the web site [www.sane.com.au](http://www.sane.com.au)

### Stigma fact sheets

- Stigma: a facts sheet
- Rights of people living with mental health problems

The fact sheets used can be accessed from [www.mentalhealth.asn.au](http://www.mentalhealth.asn.au)

### Web addresses

Participants are given a page providing the following web page addresses for further information.

[www.health.nsw.gov.au](http://www.health.nsw.gov.au)

[www.health.gov.au/hsdd/mentalhe](http://www.health.gov.au/hsdd/mentalhe)

[www.mhcs.health.nsw.gov.au](http://www.mhcs.health.nsw.gov.au)

[www.tmhc.nsw.gov.au](http://www.tmhc.nsw.gov.au)

[www.amhcn.com.au](http://www.amhcn.com.au)

[www.reachout.com.au](http://www.reachout.com.au)

[www.beyondblue.org.au](http://www.beyondblue.org.au)

### Local service information

The local service representative that attends the course provides a local service pamphlet and information with details on how to contact there local services eg. phone numbers etc.

## Mental Health

*"Working together for mental health"*

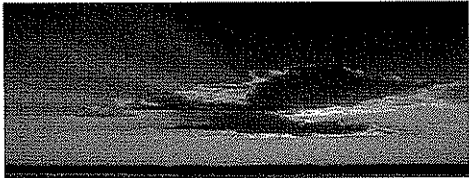

Presented By  
South Western Sydney Area Mental  
Health Service

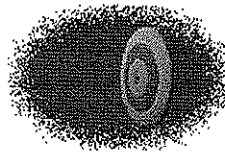

## Aim

To better equip individuals in the wider community with an understanding of mental health in order to improve services, attitudes, values and beliefs held towards people who experience mental health problems or disorders.

## Seminar Overview

- 'Life in My Shoes'  
10.30 – 10.45 MORNING TEA
- Mental Disorders – What are they really?
- Treatment options  
12.30 – 1.15 LUNCH
- How can you help?
- What about Suicide  
3.00 – 3.15 AFTERNOON TEA
- What help is around

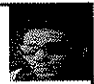

Bart is a 30 year old male who has a mental illness. He currently lives by himself in a unit block. He approaches a community service agency complaining that the neighbours have been harassing him by playing music loudly, taunting him and stealing his mail. He asks for help to deal with the neighbours.

## Questions to consider

- What is the effect of stigma on people with mental disorders and their families?
- What factors contribute to stigma?
- What is the impact of cultural issues and beliefs on stigma?
- What can we do to reduce stigma?

What is the effect of stigma on people with mental disorders and their families?



What factors contribute to stigma?

What is the impact of cultural issues and beliefs on stigma?

What can we do to reduce stigma?

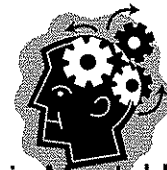

What is Mental Health?

Increased  
connectedness and  
supportiveness of  
communities

Emotional and  
social well-being

Mental Disorders  
- What are they Really?

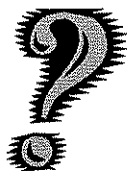

Major Disorders

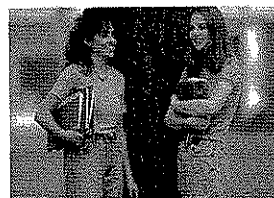

- Depression
- Anxiety
- Schizophrenia
- Bi-Polar Disorder (Manic Depression)
- Personality Disorders

## Depression

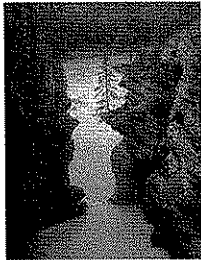

- Depression vs 'The Blues'
- Affects 1 in 5 people
- Signs & Symptoms:  
feeling sad, loss of interest, feeling worthless, sleep disturbances, changes in appetite

## Anxiety

- Affects 1 in 10 people
- Includes Panic Disorder, Generalised Anxiety and PTSD
- Signs & Symptoms
  - Physical – eg pounding heart, hyperventilation
  - Psychological – eg worry, panic

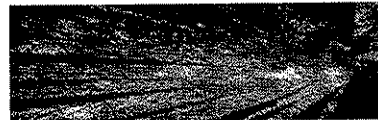

## Schizophrenia

- NOT A SPLIT PERSONALITY
- Affects 1 in every 100 people
- Signs & Symptoms
  - Positive: Confused thinking, delusions and hallucinations
  - Negative: Poor motivation, poor self esteem, isolation

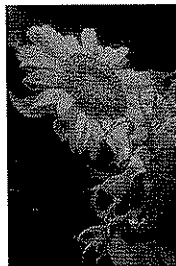

## Bi-Polar Disorder

(Manic Depression)

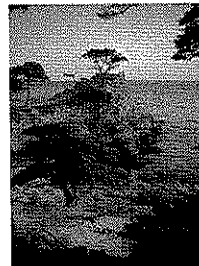

- Signs & Symptoms
  - Episodes of severe depression and hypo/mania
- Affects 2 in every 100

## Personality Disorders

- Very Complex group of disorders most common is Borderline Personality Disorder
- Signs and Symptoms
  - Difficulty relating to others, mood swings, impulsive behaviour, suicidal ideation/ self-harm, Often coexisting depression, anxiety or PTSD
- Affects 2 in every 100 people

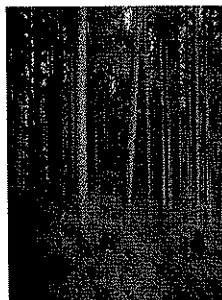

## Treatment Options

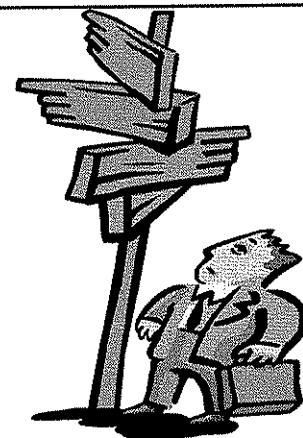

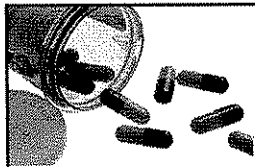

## Medical Treatments

- Medications  
Anti-depressants, anti-psychotics, mood stabilisers,  
NB: Significant side-effects can be experienced such as:  
- drowsiness, muscle stiffness, weight gain,  
restlessness, dry mouth, sexual dysfunction
- Electro Convulsive Therapy (ECT)

## Psychosocial Interventions

- Case Management
- Psychotherapy
- Family / carer support
- Disability support
- Information and education

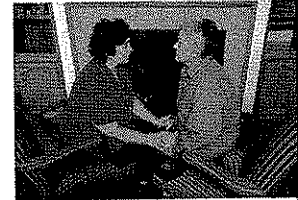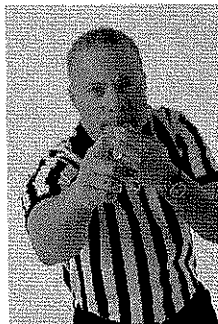

## Participation and Advocacy

- Consumer Network
- Carer Network
- Community Consultative Committees (CCC)

## How Can You Help?

What questions do you have about working with people experiencing a mental health problem or disorder?

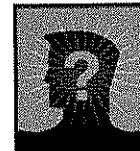

## Mental Health Partnerships

- Mental health clinical services
- Mainstream community services
- Mental health support (non-clinical) services
  - Disability support services
  - Services for family and carers

## Supporting people with mental health problems

- Always treat the person with respect and dignity and in the same way you would treat anyone else
- Respect privacy and confidentiality
- Be non-judgemental
- Accept the person's reality
- Avoid confrontation

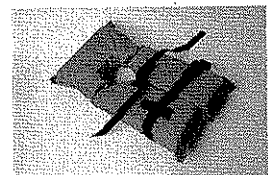

## How can you help?

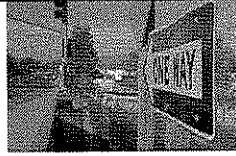

- Encourage or assist the person to seek professional advice
- Encourage activities that promote good mental health
  - Physical activity
  - Stress management
  - Development of positive coping strategies
  - Social activities
- Provide other relevant services as required

1. What else would you need to know to assess and respond to this situation?
2. Should the client be referred to a mental health service for possible clinical intervention? If so, why?
3. What other factors might be impacting on this client's mental health?
4. What other support agencies could be involved and what role might they play?



Lola, aged 45, has made contact with the local community neighbourhood centre. She is very distressed about her mother who has been becoming more difficult over the past six months. Her mother has had a mental illness for many years. Lola lives close to her mother but works and has 4 children.



John is a 32 year old male who has schizophrenia. He approaches an employment service for assistance to get a job. John lives alone in community housing and is quite lonely. He is stable on medication. He has been unemployed since he became ill, but was a carpenter prior to his illness.

Tobias is a 17 year old male who has been admitted to the local youth refuge. He was asked to leave home because of his drug use. He has just dropped out of school. Over the past year his teachers noticed that he seemed to be quite depressed and his friend told the school counsellor that he had been talking about killing himself.



Selina is a 33 year old female who has 2 children who both go to school. She has come into a St Vincent de Paul shop to ask for some assistance because her electricity has just been cut off. Selina tells the worker that she is not sleeping well and is feeling very agitated.

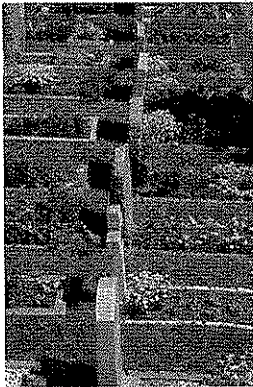

## What about Suicide?

## Facts and Figures

In any given year in NSW :

- up to 90,000 people may show possible suicidal behaviour
- 30,000 of these people will attempt suicide
- 700 people will die as a result

(ABS 1996)

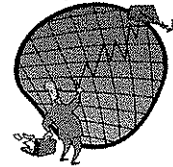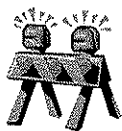

## At Risk Groups

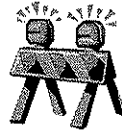

- Young and older people, males, minority groups
- Alcohol and substance abuse, mental health problem or disorder, chronic pain
- History of suicide attempts, feelings of hopelessness, major loss or lifestyle change
- Isolation, unemployed

## Protective Strategies

- Strong social supports
- Optimism
- Ability to access help
- Effective coping strategies
- Problem solving ability
- Willingness to accept help

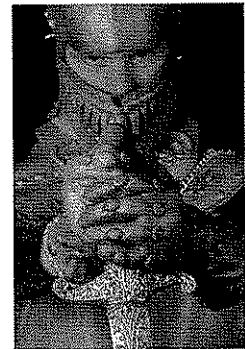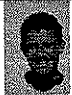

Fred is 23 years old married with one child and recently lost his job and driver's licence. He enters the neighbourhood centre to ask if he could have some money as he needed to buy some pain relief for his chronic back injury. As you are discussing with Fred the issue of the money he tells you that he wants to kill himself because life is just too much at the moment.

## Further Training is Available

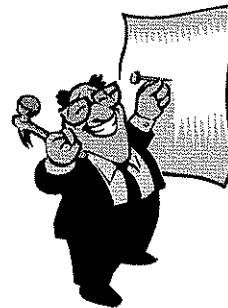

For Details Contact:  
*Your local  
Area Suicide Prevention  
Coordinator  
Or MH Service*

## More Information

### **Mental Health Information Service**

- PH: 9816 5688 or [www.mentalhealth.asn.au](http://www.mentalhealth.asn.au).

### •**SANE Australia**

- 1800 688 382 or [www.sane.org](http://www.sane.org)

• [www.mentalhelp.net](http://www.mentalhelp.net)

• [www.healingwell.com](http://www.healingwell.com)

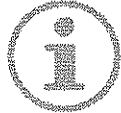

## Summary

- Values, Attitudes and Beliefs
- 'Life in my Shoes'
  - Mental Disorders
- Treatment Options
  - What about Suicide?
- How can you help?
  - What help is around?

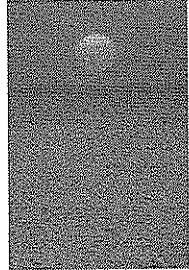

Supplement: MOESM1 [file 9482094]
